# Supplementary material for: Mechanism of high photoluminescence quantum yield of melem
Source: Royal Society of Chemistry journal article supplement (doi:10.1039/d2cp03693b), 2022-01-01
Supplement: d2cp03693b1.pdf [file d2cp03693b1.pdf]

## Supporting Information

### Mechanism of High Photoluminescence Quantum Yield of Melem

Hiroki Kiuchi, Yoriko Sonoda, Yuto Miyake, Fumiya Kobayashi, Jun'ya Tsutsumi, Makoto  
Tadokoro, Kaname Kanai

XRD analysis was conducted using a diffractometer (Ultima IV, Rigaku) with a Cu K $\alpha$   
radiation source ( $\lambda = 0.15496$  nm).

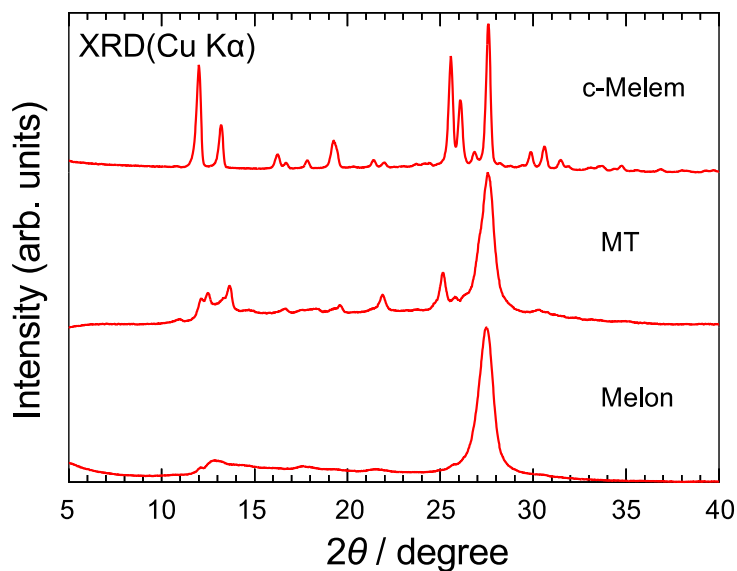

Fig. S1. XRD profiles of c-melem, MT, and melon. The melon and MT samples are the same samples as in the previous study.<sup>1</sup>

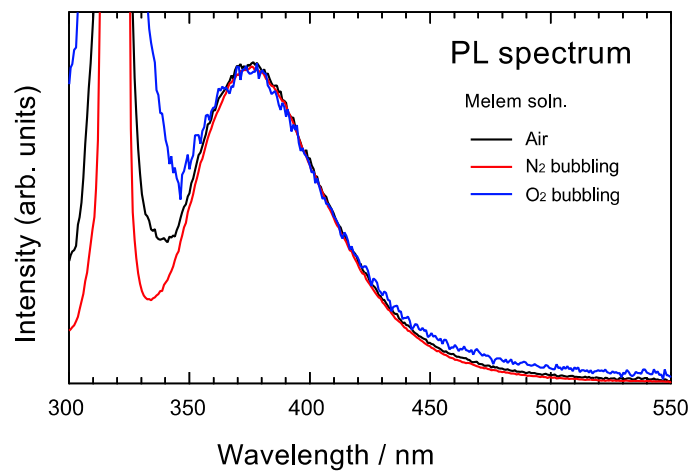

Fig. S2. PL spectra of air, N<sub>2</sub> bubbling, and O<sub>2</sub> bubbling melem solution samples. The vertical axis represents the PL emission intensity, with the peak at 320 nm because of photoexcitation. The data are the same as in Figure 3(b), but normalized by the intensity of the 376 nm peak.

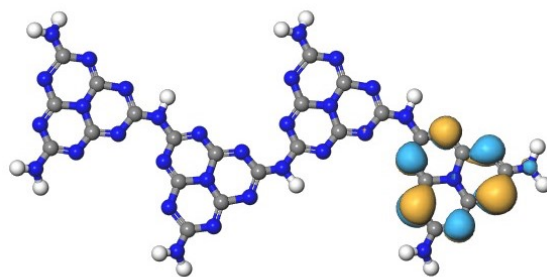

**HOMO - 4**

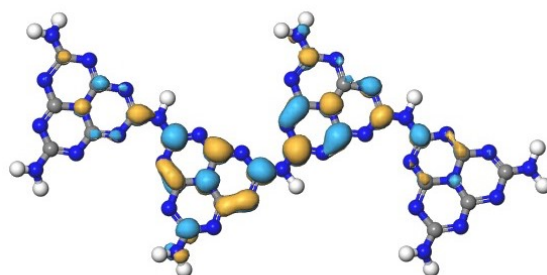

**LUMO**

Fig. S3. Wave functions of the HOMO-4 and LUMO of MT simulated by DFT calculation. The blue and yellow parts represent different wavefunction signs. The lowest-energy emission from MT is caused by transitions between these two orbitals.

1 Y. Miyake, G. Seo, K. Matsubishi, N. Takada and K. Kanai, *Materials Advances*, 2021, **2**, 6083–6093.
